# Supplementary material for: Towards improving the spatial testability of aftershock forecast models
Source: Copernicus journal article supplement (doi:10.5194/egusphere-2023-309), 2023-03-09
Supplement: Supplementary file 1 [file egusphere-2023-309-supplement.pdf]

**Figure S1:**

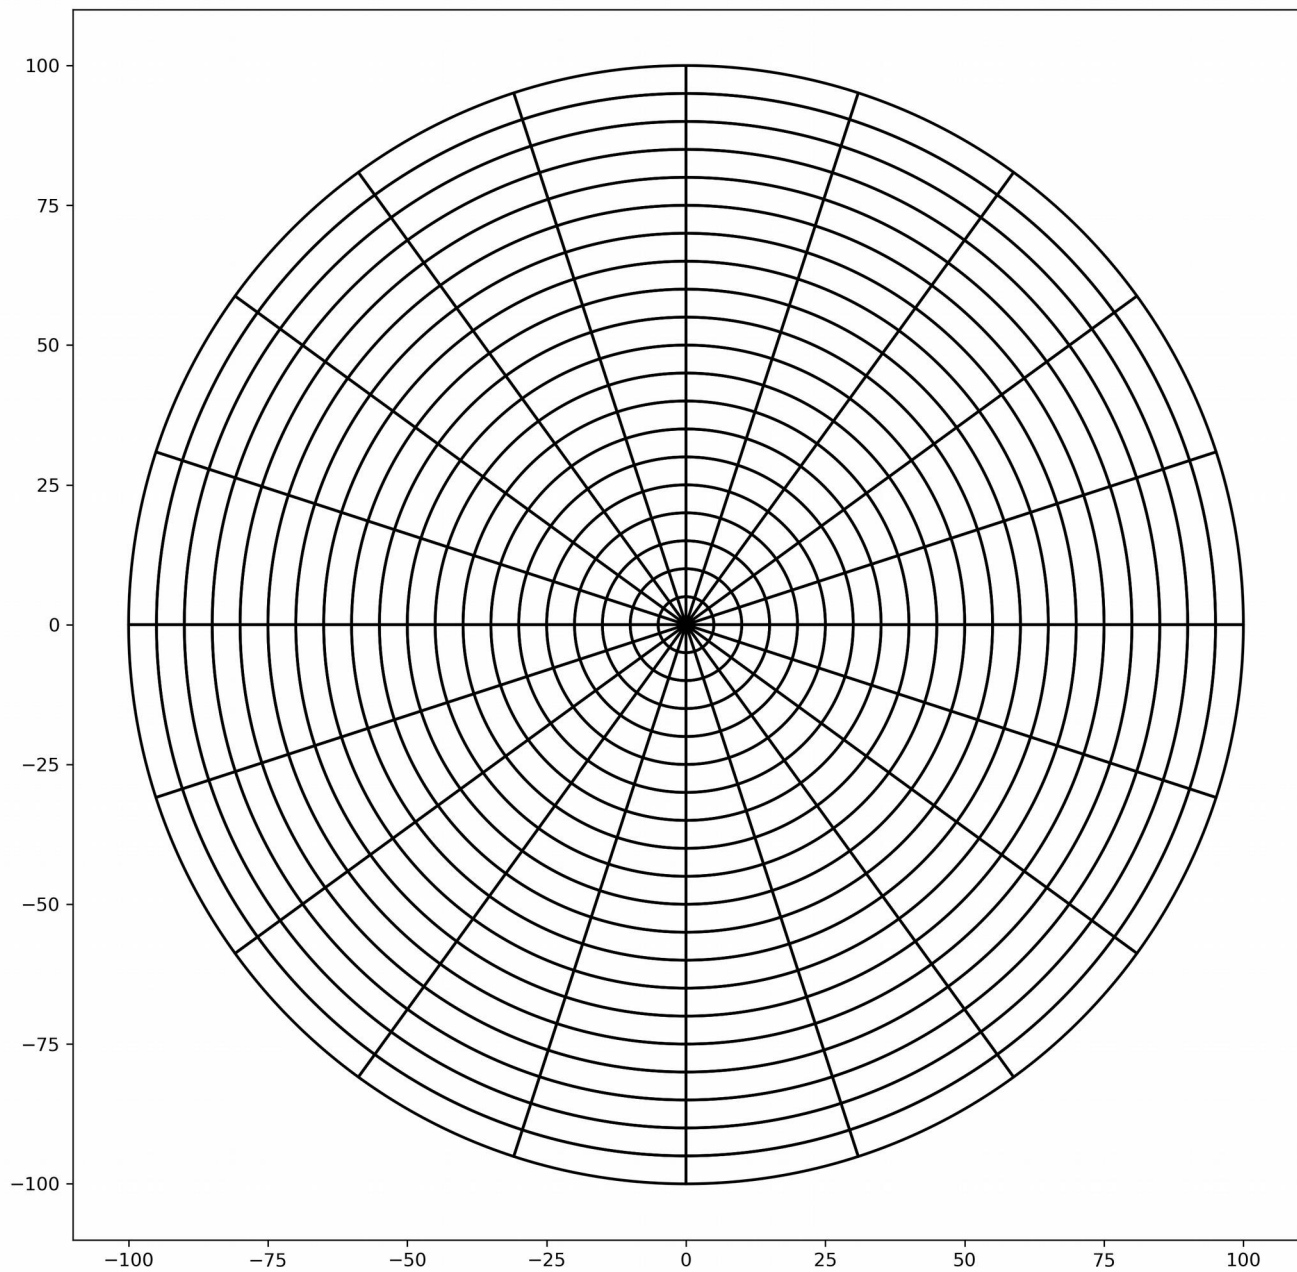

Figure S1: Radial grid or circular grid, created by drawing 20 concentric circles within the radius of 100km, and each circle is further divided into 20 arcs, thereby providing a radial grid with 400 spatial cells. The radial grid provides a simplest form of a multi-resolution grid with the area of each cell increasing away from center.

**Figure S2:**

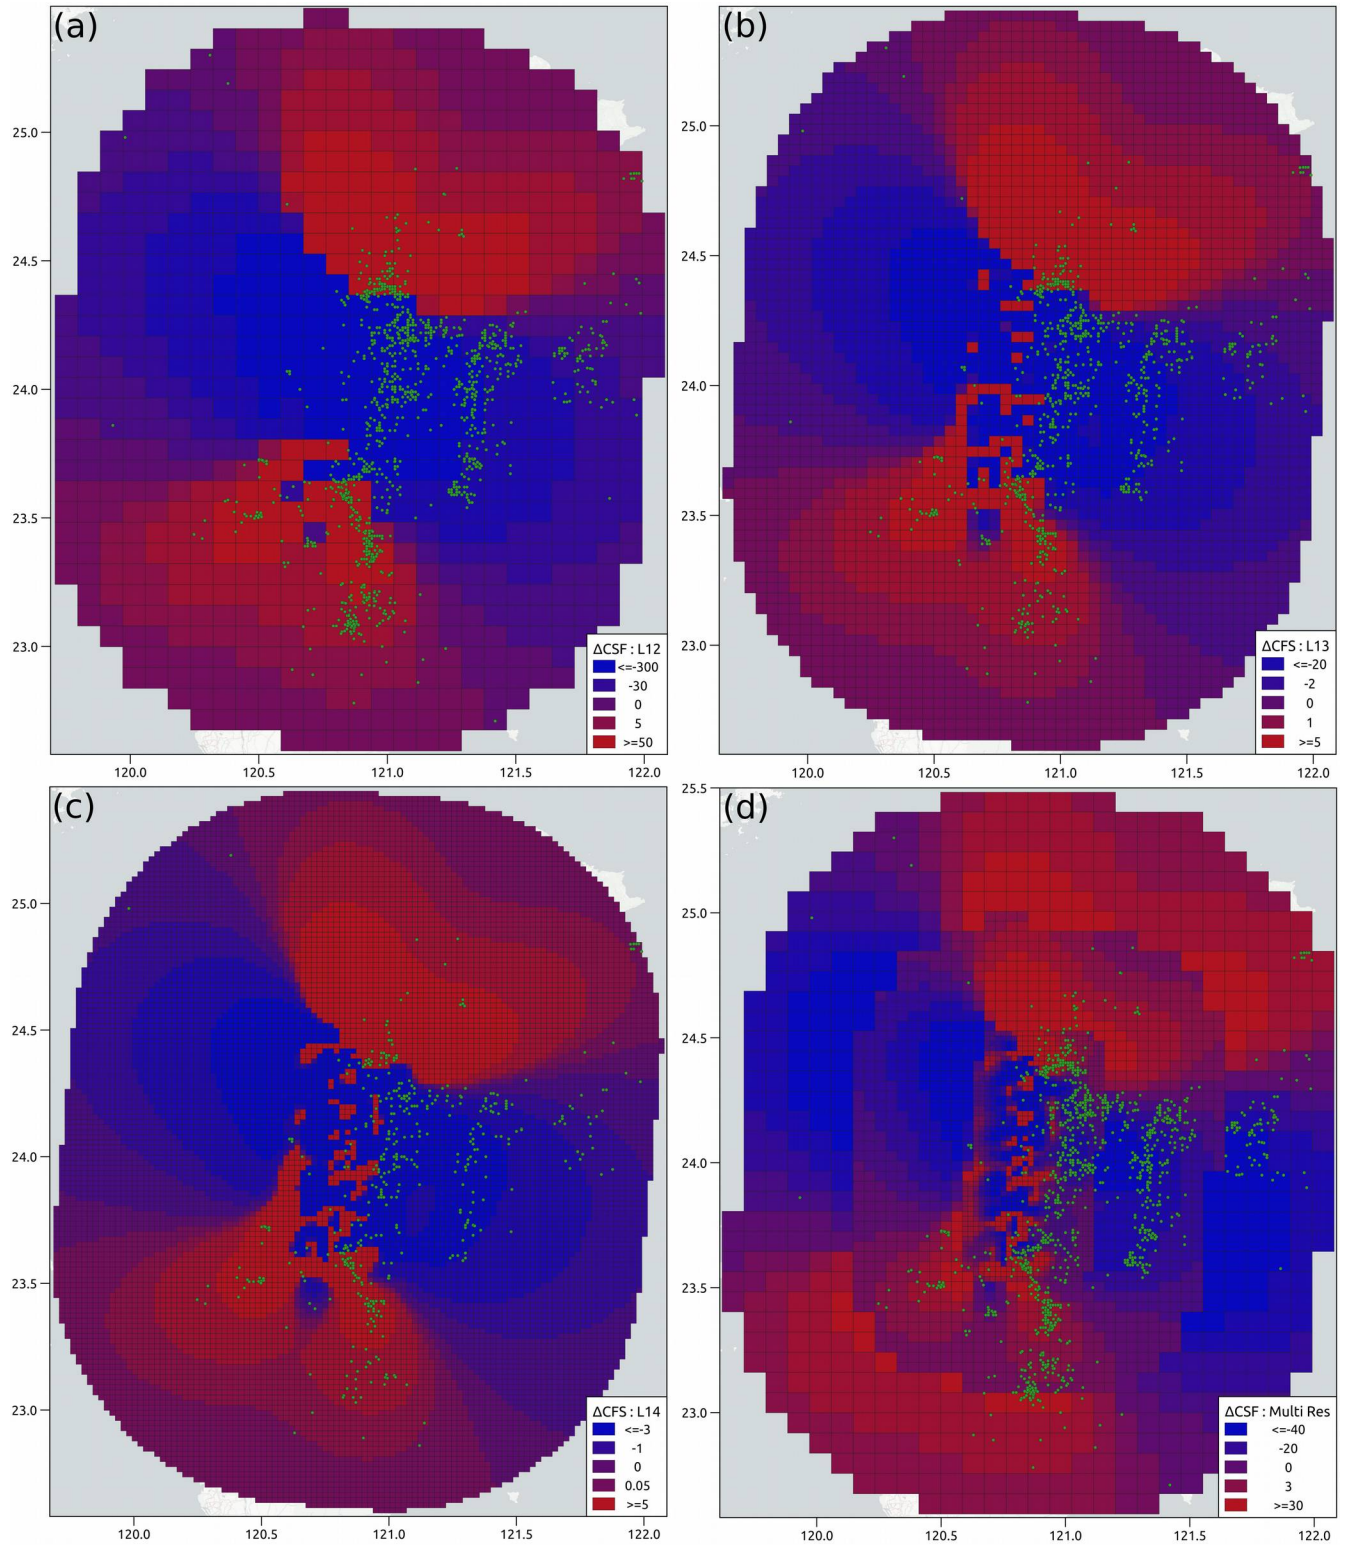

Figure S2: CFS aftershocks forecast model for 1999 Chi-Chi earthquake aggregated on the Quadtree grids of different resolutions. The forecast shown here is from 3D cells around depth 7.5km aggregated on: (a): single-resolution grid L12, (b): single-resolution grid L13, (c): single-resolution grid L14, (d): multi-resolution grid.



**Figure S3:**

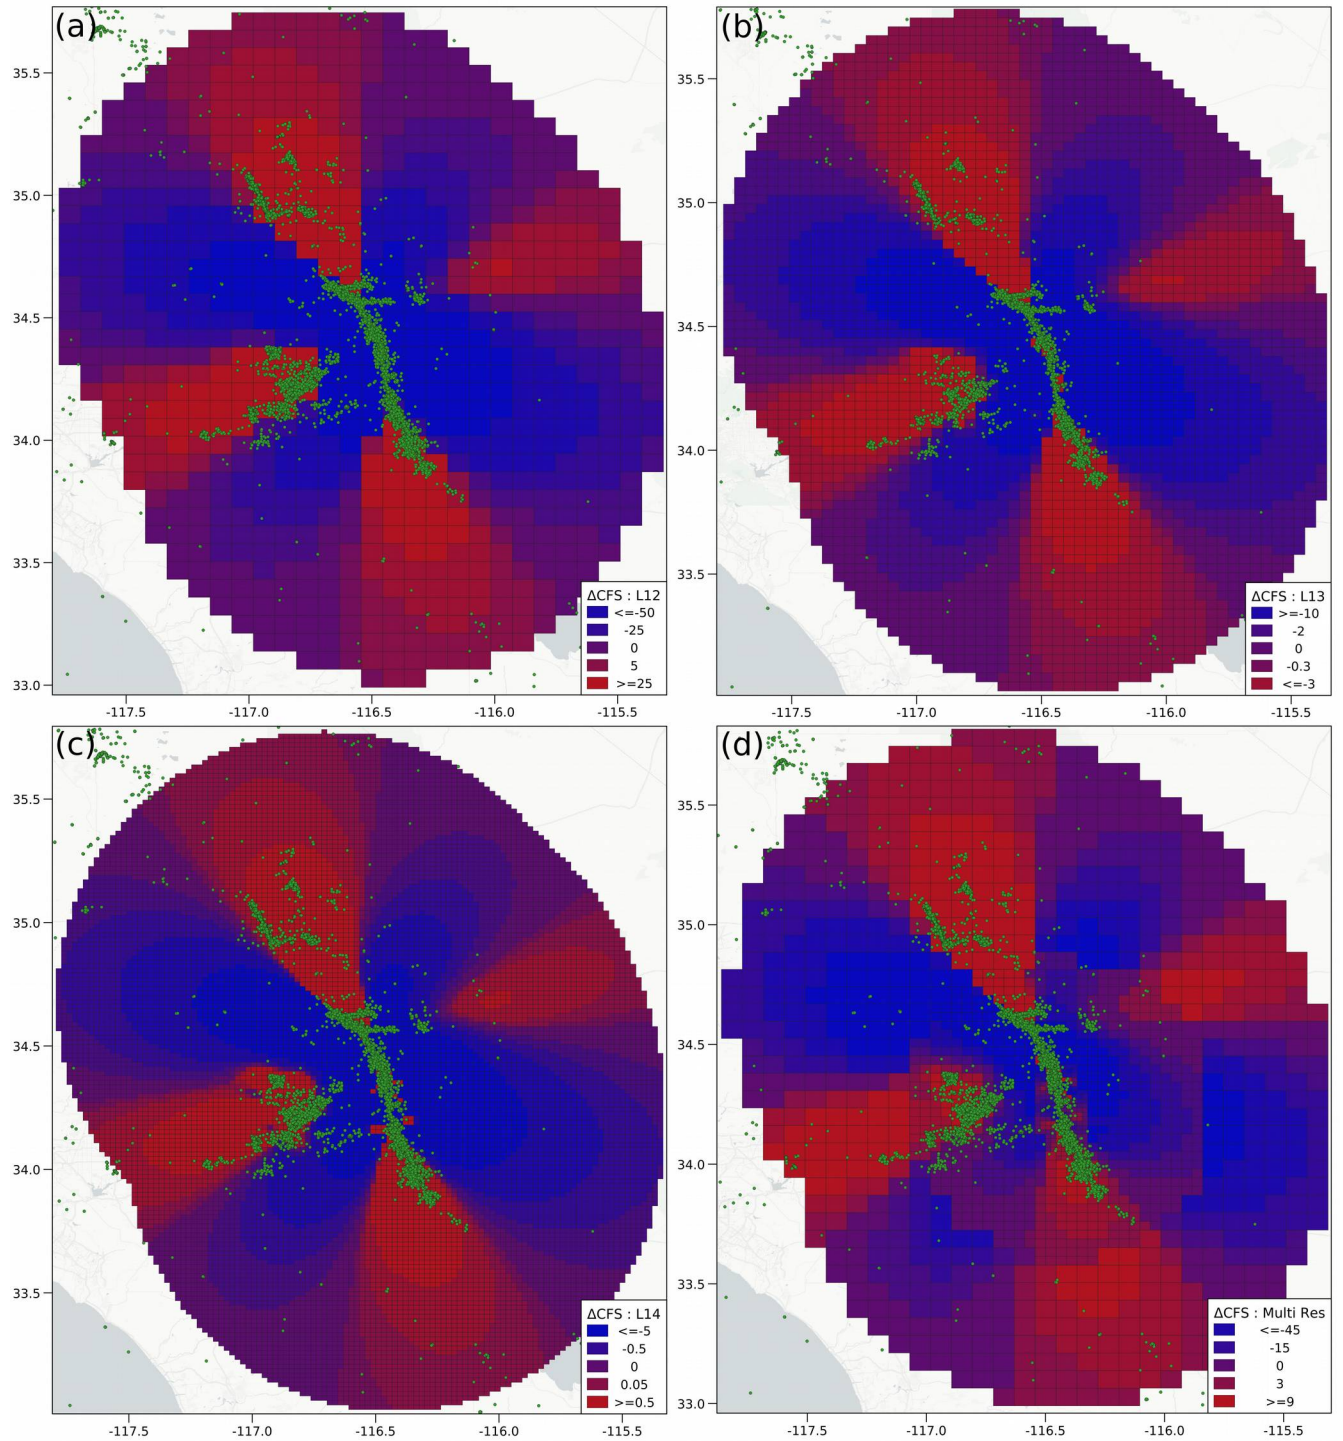

Figure S3: Coulomb aftershocks forecast model for Landers 1992 earthquake aggregated on the Quadtree grids of different resolutions. The forecast shown here is from 3D cells around depth 7.5km aggregated on: (a): single-resolution grid L12, (b): single-resolution grid L13, (c): single-resolution grid L14, (d): multi-resolution grid.
